# Supplementary material for: Dietary Efficacy Evaluation by Applying a Prediction Model Using Clinical Fecal Microbiome Data of Colorectal Disease to a Controlled Animal Model from an Obesity Perspective
Source: MDPI journal article supplement (doi:10.3390/microorganisms10091833), 2022-09-14

**Supplementary Information**

Analysis at other ranks in every clinical samples

## Supplementary Figure Legends

### Supplementary Figure S1. Beta diversity and Composition of microbiota at class, order, family and species in IBD clinical samples

The left-side beta diversity analysis was visualized by the principal coordinate analysis(PCoA) method using the Bray-Curtis dissimilarity measure at the **(a)** class, **(b)** order and **(c)** family levels. The middle-side heatmap and clustering of individual control and IBD samples indicate relative abundance at the **(a)** class, **(b)** order and **(c)** family levels. Hierarchical clustering was measured by Euclidean distance. The right-side bar plots show average relative abundance of individual key taxa between control and IBD stool microbiota at the **(a)** class, **(b)** order and **(c)** family levels, with error bars representing the standard error (SE). Significant differences were calculated by a t-test (\* =  $p < 0.05$ , \*\* =  $p < 0.01$ ).

### Supplementary Figure S2. Beta diversity and Composition of microbiota at class, order, family and species in CRC clinical samples

The left-side beta diversity analysis was visualized by the principal coordinate analysis(PCoA) method using the Bray-Curtis dissimilarity measure at the **(a)** class, **(b)** order and **(c)** family levels. The middle-side heatmap and clustering of individual control and CRC samples indicate relative abundance at the **(a)** class, **(b)** order and **(c)** family levels. Hierarchical clustering was measured by Euclidean distance. The right-side bar plots show average relative abundance of individual key taxa between control and CRC stool microbiota at the **(a)** class, **(b)** order and **(c)** family levels, with error bars representing the standard error (SE). Significant differences were calculated by a t-test (\* =  $p < 0.05$ , \*\* =  $p < 0.01$ ).

### Supplementary Figure S3. Beta diversity and Composition of microbiota at class, order, family and species in clinical samples

The left-side beta diversity analysis was visualized by the principal coordinate analysis(PCoA) method using the Bray-Curtis dissimilarity measure at the **(a)** class, **(b)** order and **(c)** family levels. The middle-side heatmap and clustering of individual samples of normal, HFD, NFE and NFW groups indicate relative abundance at the **(a)** class, **(b)** order and **(c)** family levels. Hierarchical clustering was measured by Euclidean distance. The right-side bar plots show average relative abundance of individual key taxa between the normal, HFD, NFE and NFW rat stool microbiota at the **(a)** class, **(b)** order and **(c)** family levels, with error bars representing the standard error (SE). Significance between groups was assessed by Mann-Whitney U test (\* = Ad.  $p < 0.05$ , \*\* = Ad.  $p < 0.01$ ).

Supplementary Figure S1.

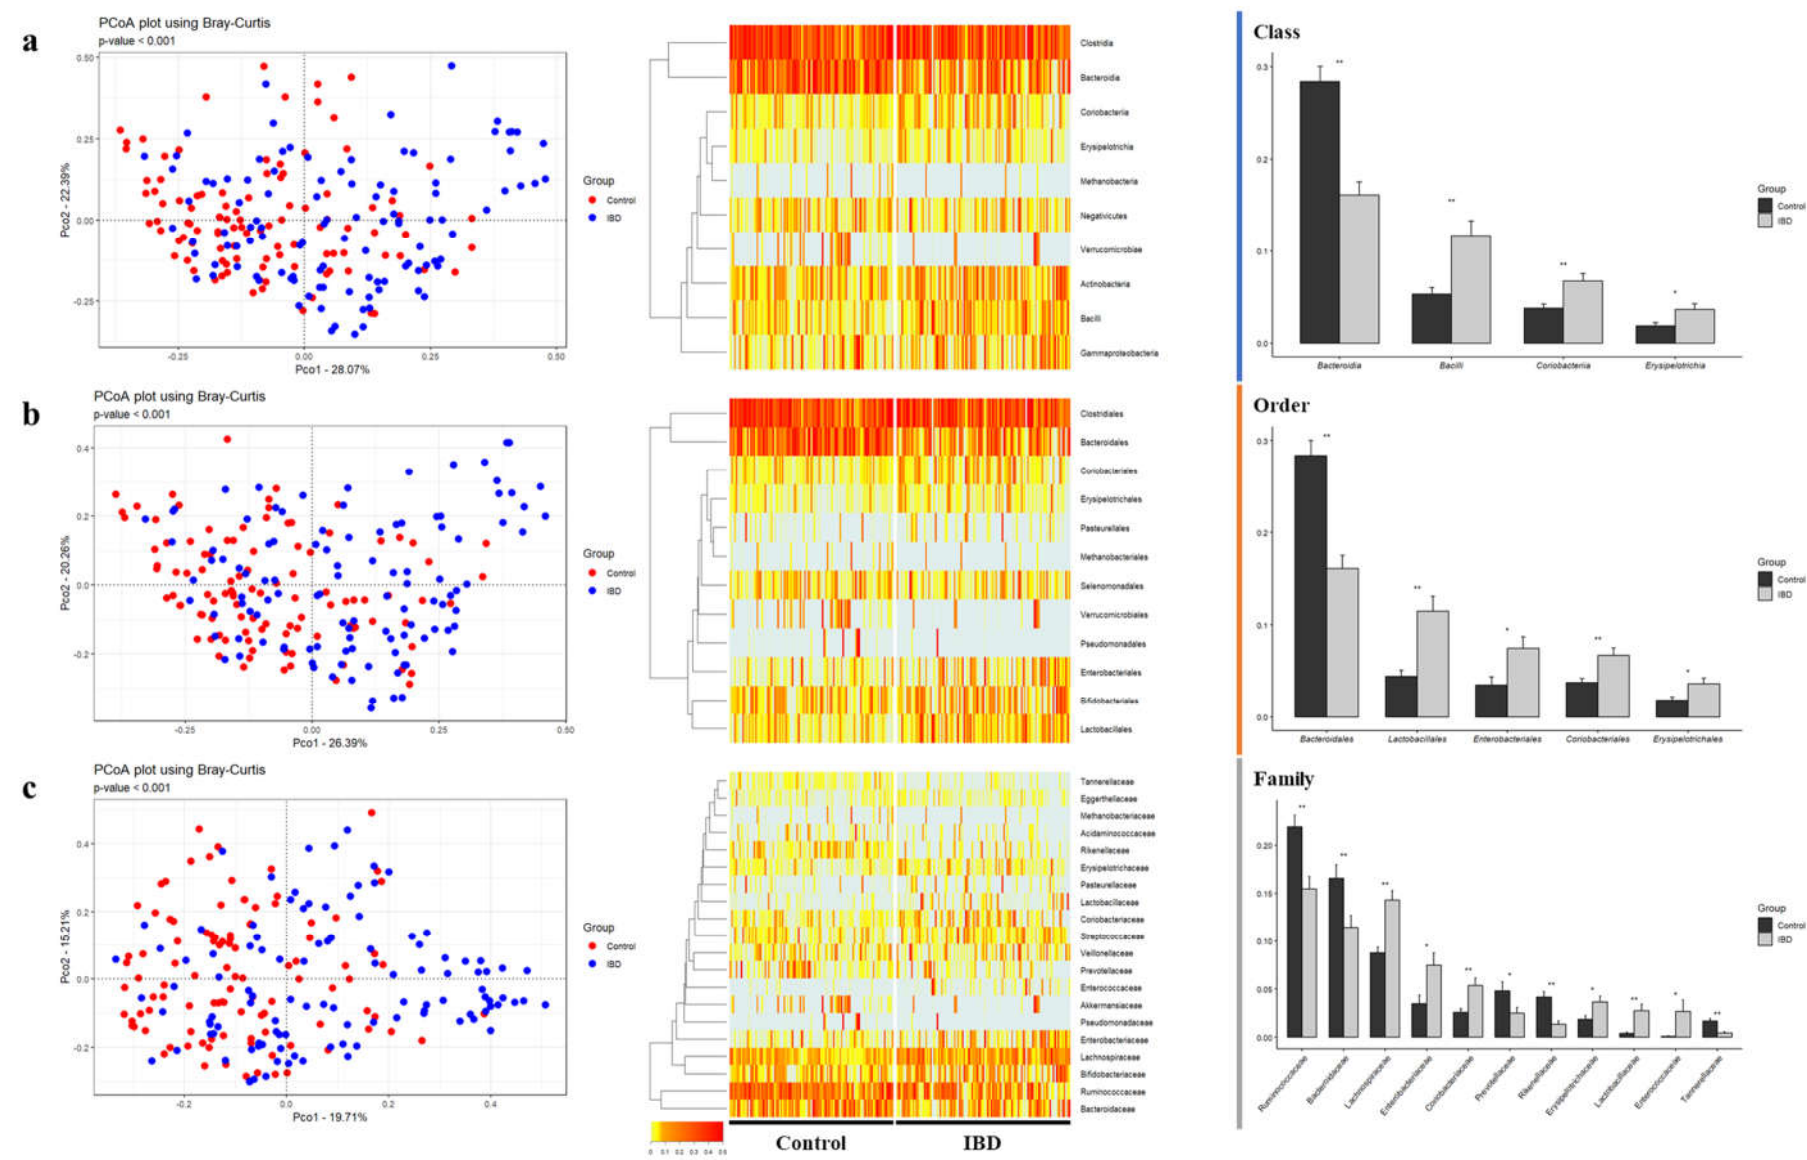

Supplementary Figure S2.

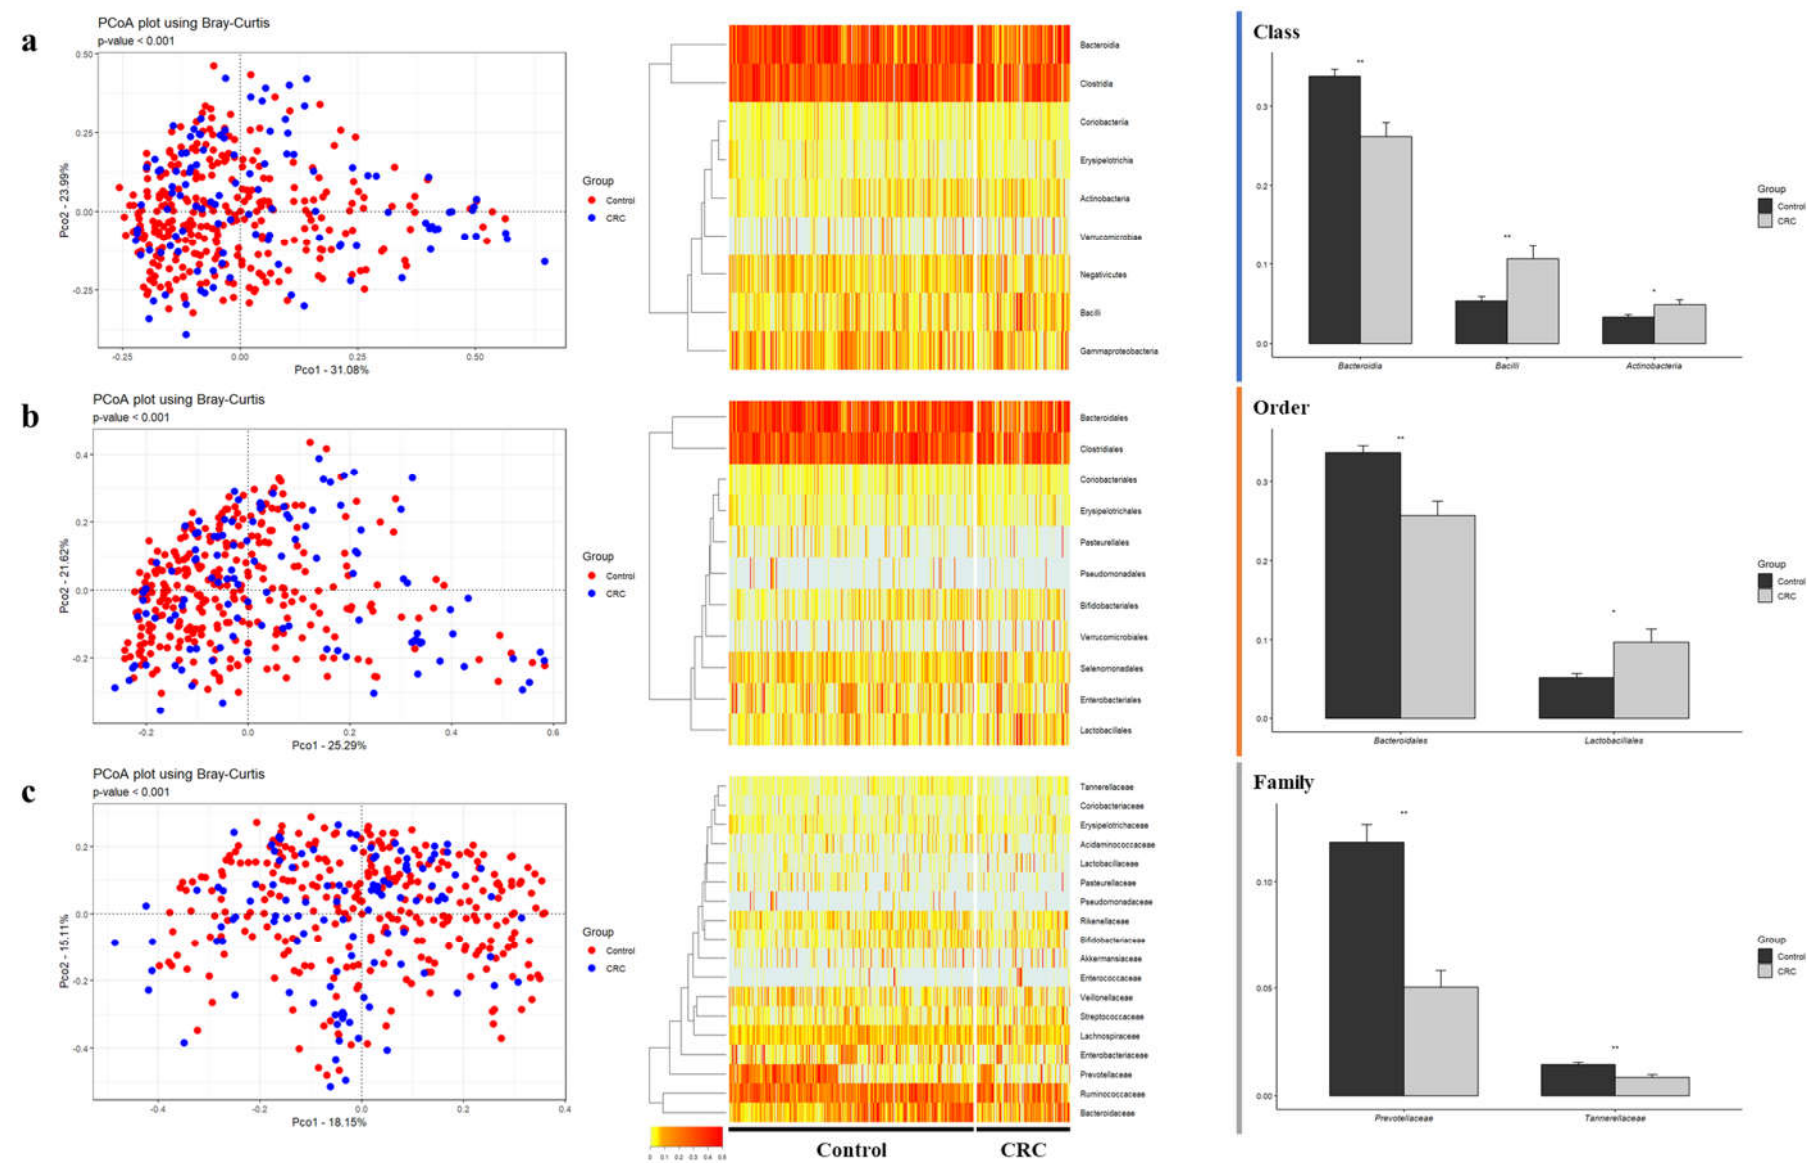

Supplementary Figure S3.

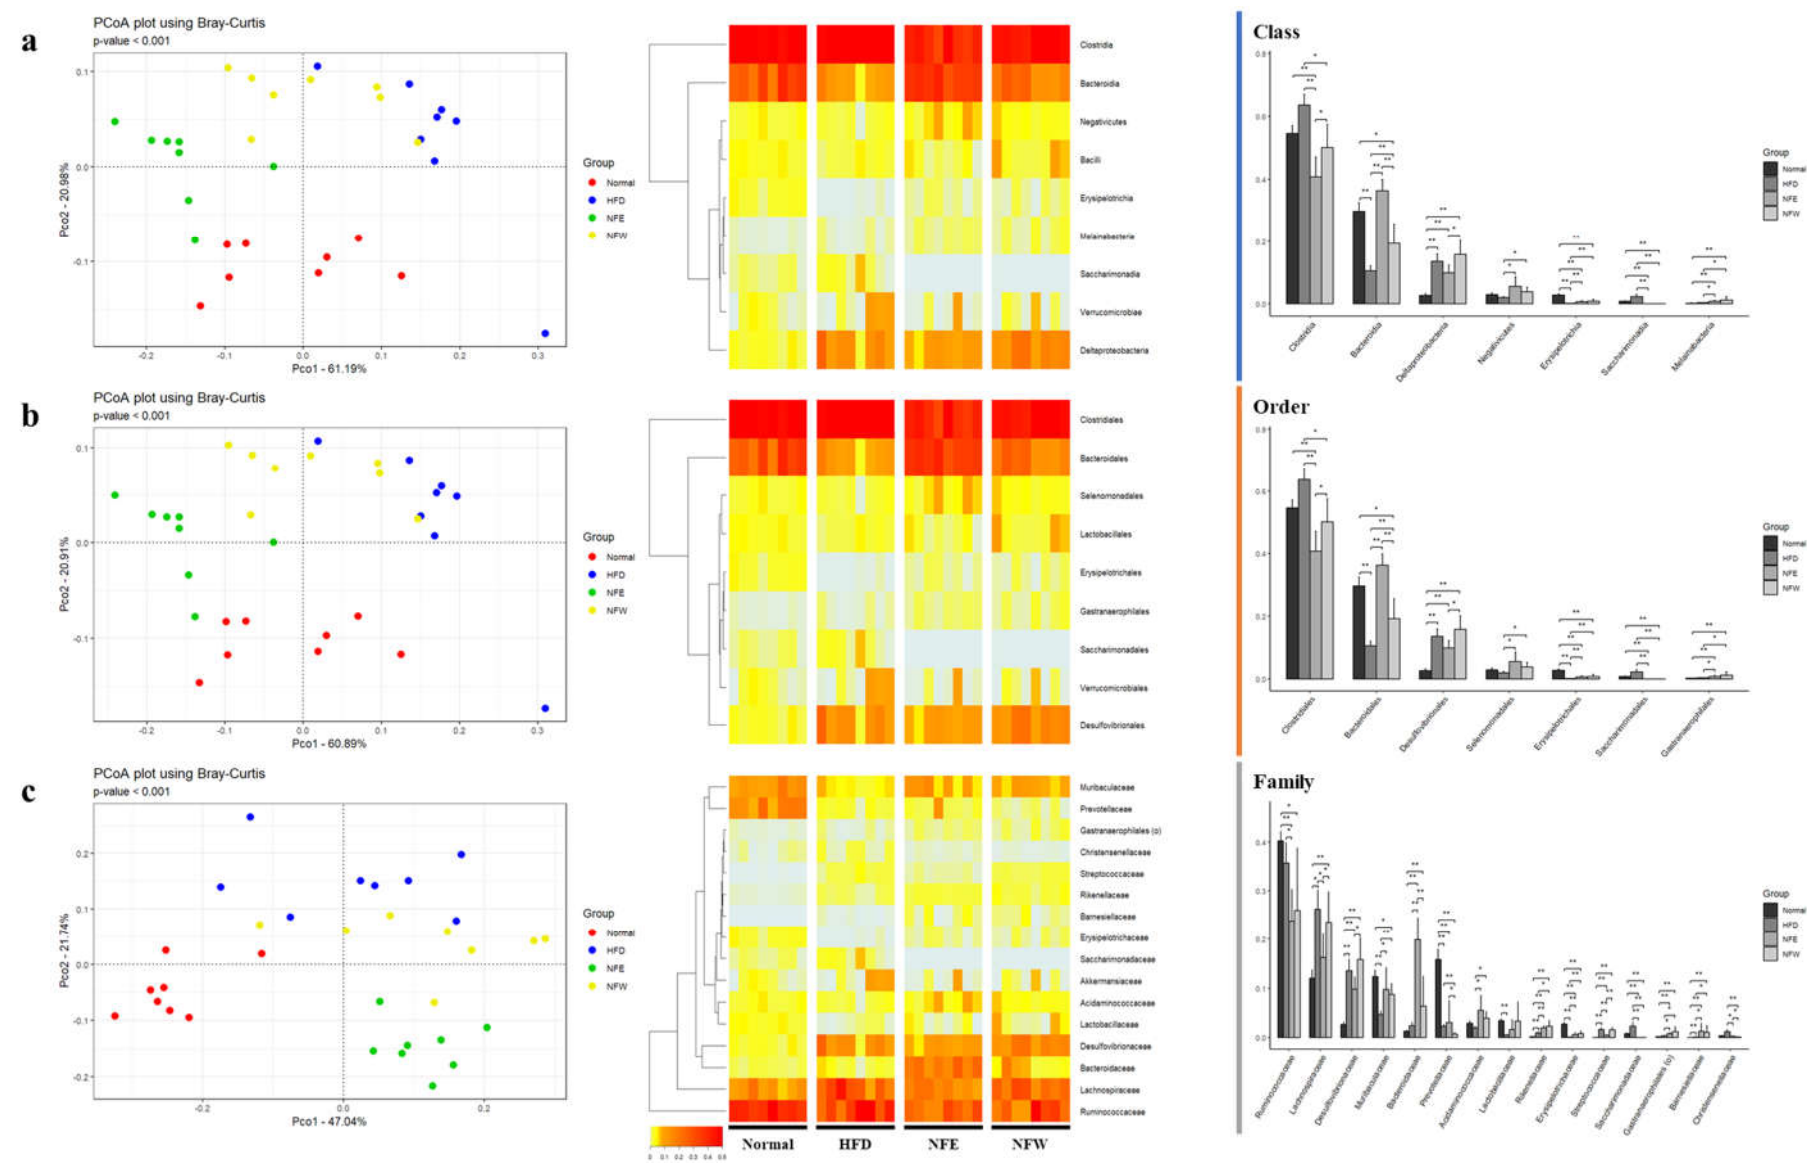

Supplement: s1 [file s1]
